# Supplementary material for: HEY2, a target of miR-137, indicates poor outcomes and promotes cell proliferation and migration in hepatocellular carcinoma
Source: PubMed Central journal article supplement (PMC5122371; doi:10.18632/oncotarget.9343), 2016-05-13
Supplement: oncotarget-07-38052-s001.pdf [file oncotarget-07-38052-s001.pdf]

## SUPPLEMENTARY FIGURES

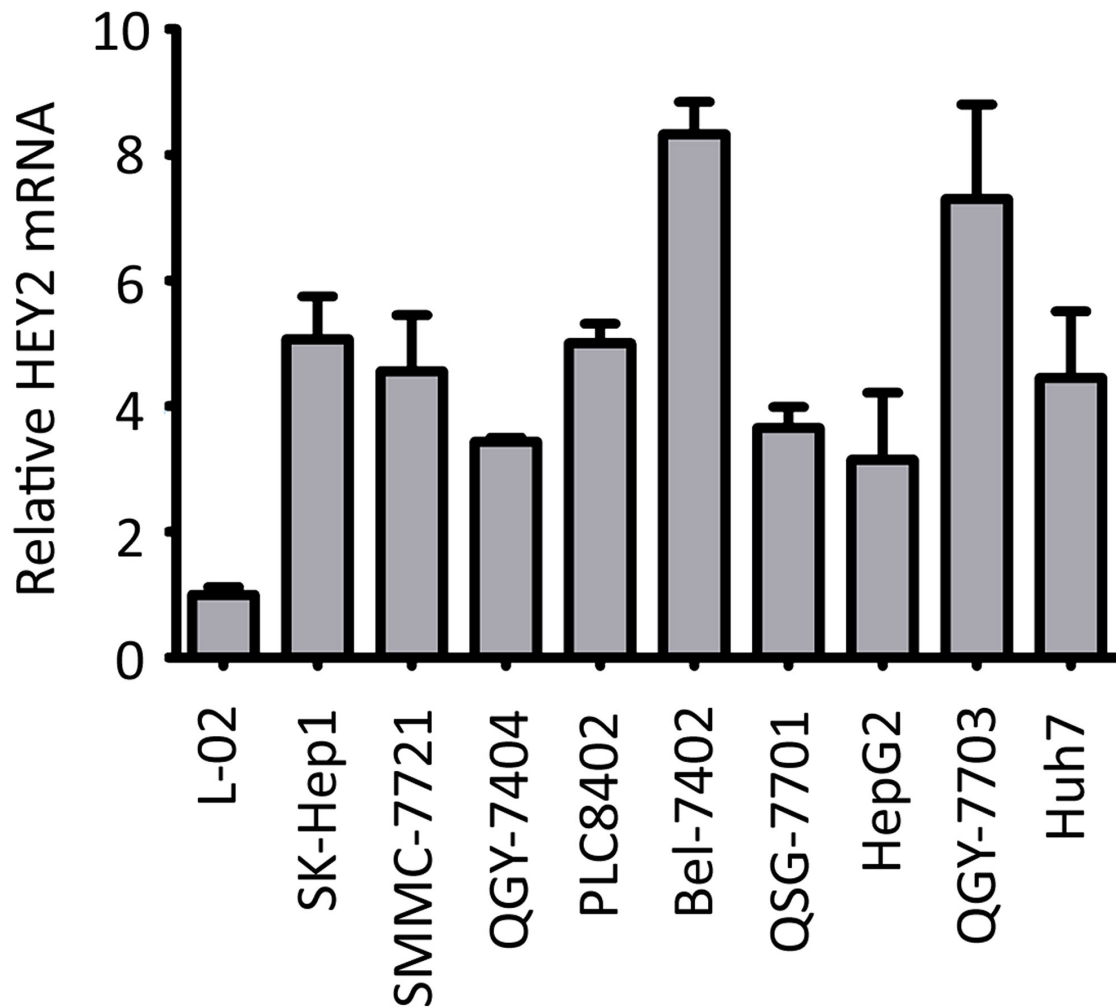

**Supplementary Figure S1: HEY2 mRNA expression in HCC cell lines.** The expressions of HEY2 mRNA in HCC cell lines (HepG2, QGY7404, Bel-7402, QGY-7703, Huh7, QSG-7701, PLC8402, SMMC-7721 and SK-Hep1) and immortalized liver cell line (L-02) were determined by qRT-PCR.

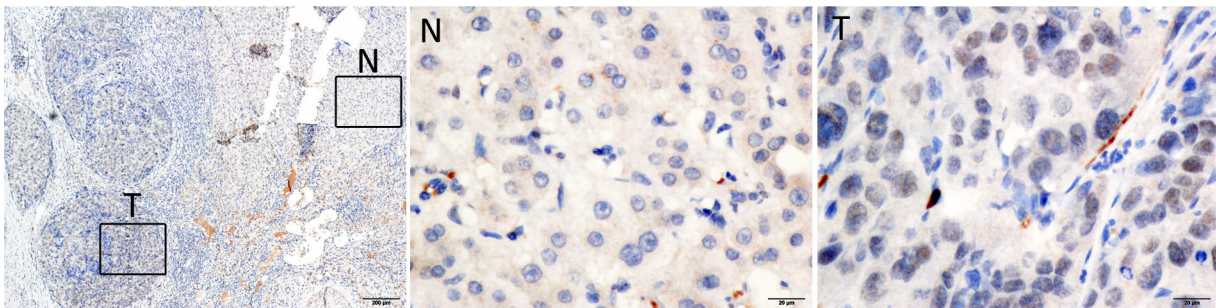

**Supplementary Figure S2: HEY2 expression in tumor and nontumor tissues on the same slide.** IHC staining was performed on the slide that consisting of both HCC and nontumorous tissues.

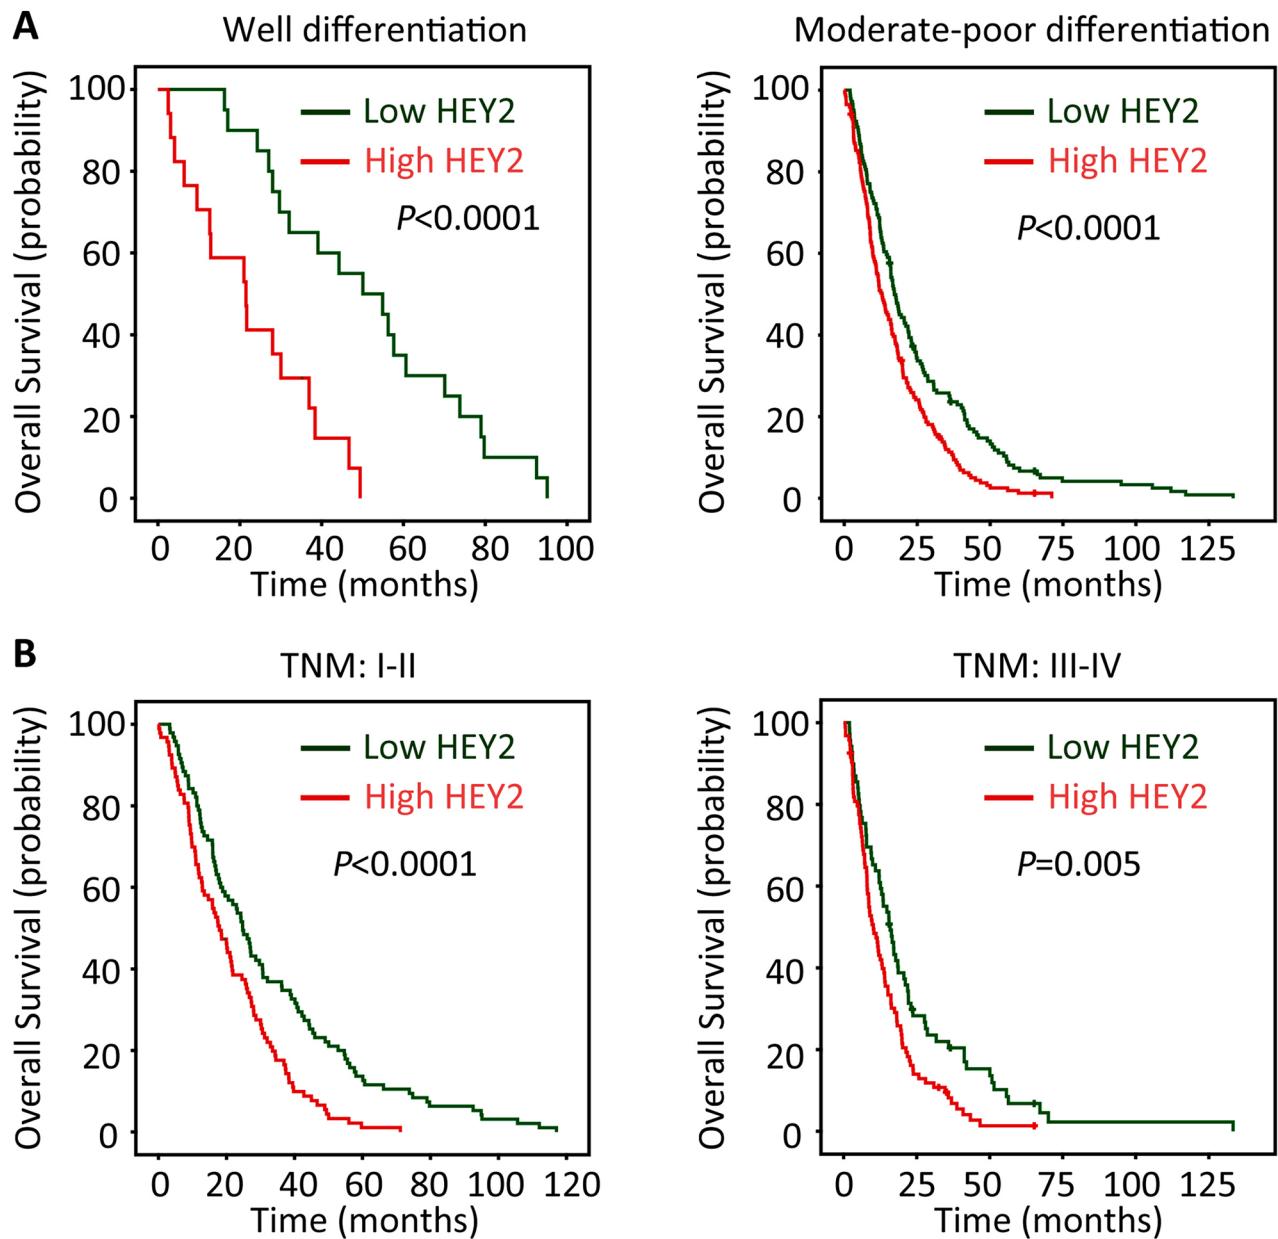

**Supplementary Figure S3: The prognostic value of HEY2 in patients with different tumor differentiation and TNM stage in training cohort.** The connection of HEY2 expression and overall survival of HCC patients with well or moderate-poor tumor differentiation **A.** and I-II or III-IV TNM stage **B.** was determined by stratified survival analysis (log-rank test).

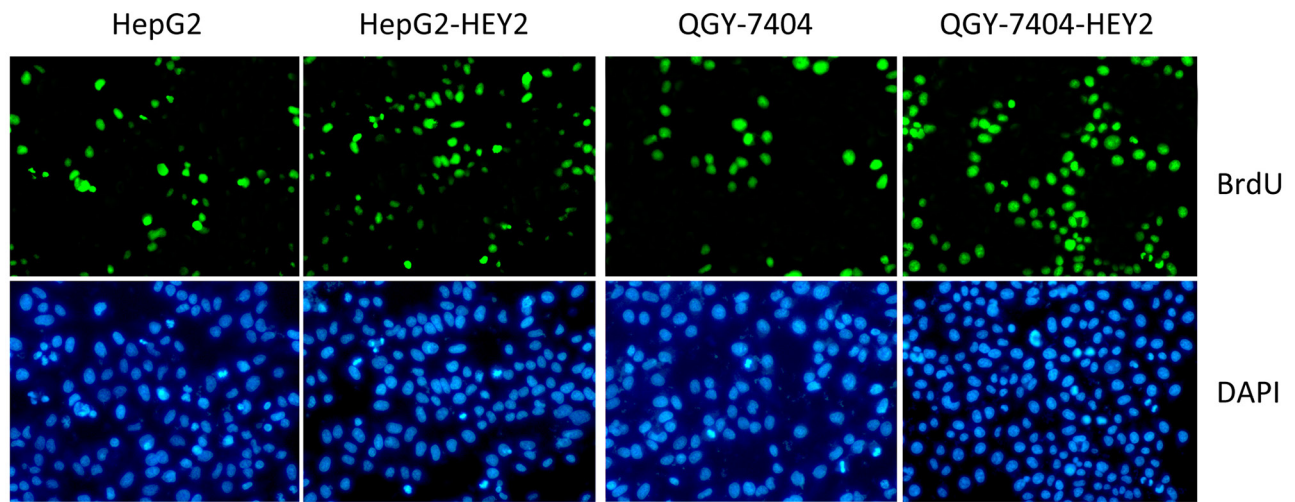

**Supplementary Figure S4: Effect of HEY2 overexpression on cell proliferation.** Cells were transfected with HEY2 overexpression or empty vectors for 24 h. BrdU assays were performed to evaluate the effect of HEY2 overexpression on cell proliferation.
